# Supplementary material
Source: MDPI journal article supplement (https://www.mdpi.com/2076-3263/8/6/217)
Supplement: s1 [file s1]

Geosciences-276077 Supplementary Materials

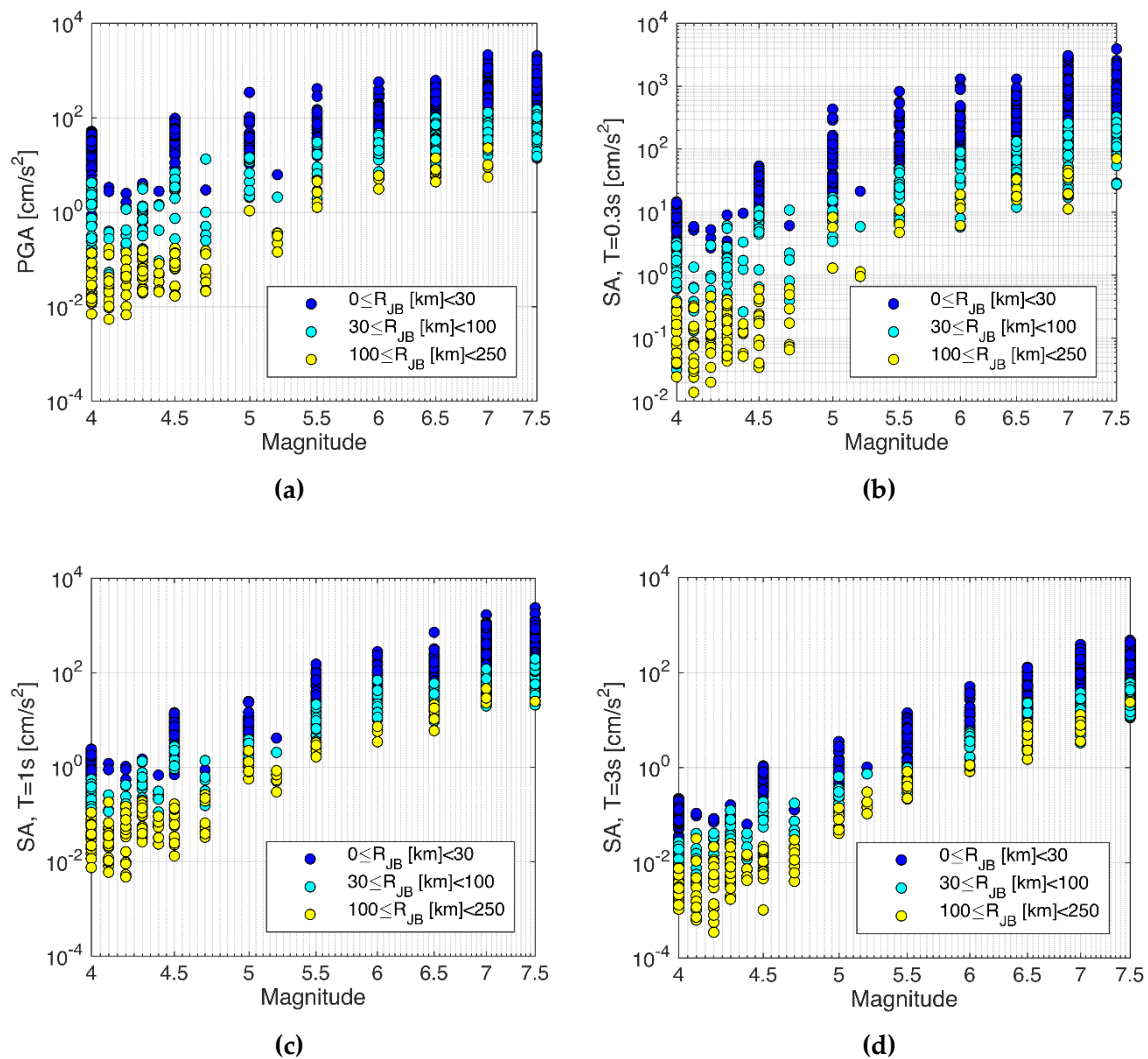

**Figure A1.** Distribution of ground-motion parameters of SET1 as a function of magnitude for different classes of distances: (a) PGA; (b) SA-T=0.3s; (c) SA-T=1s; (d) SA-T=3s.

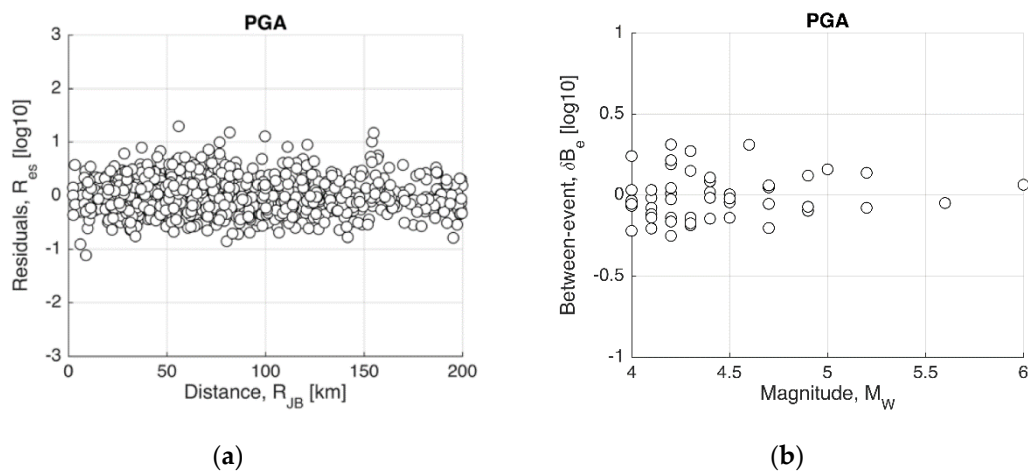

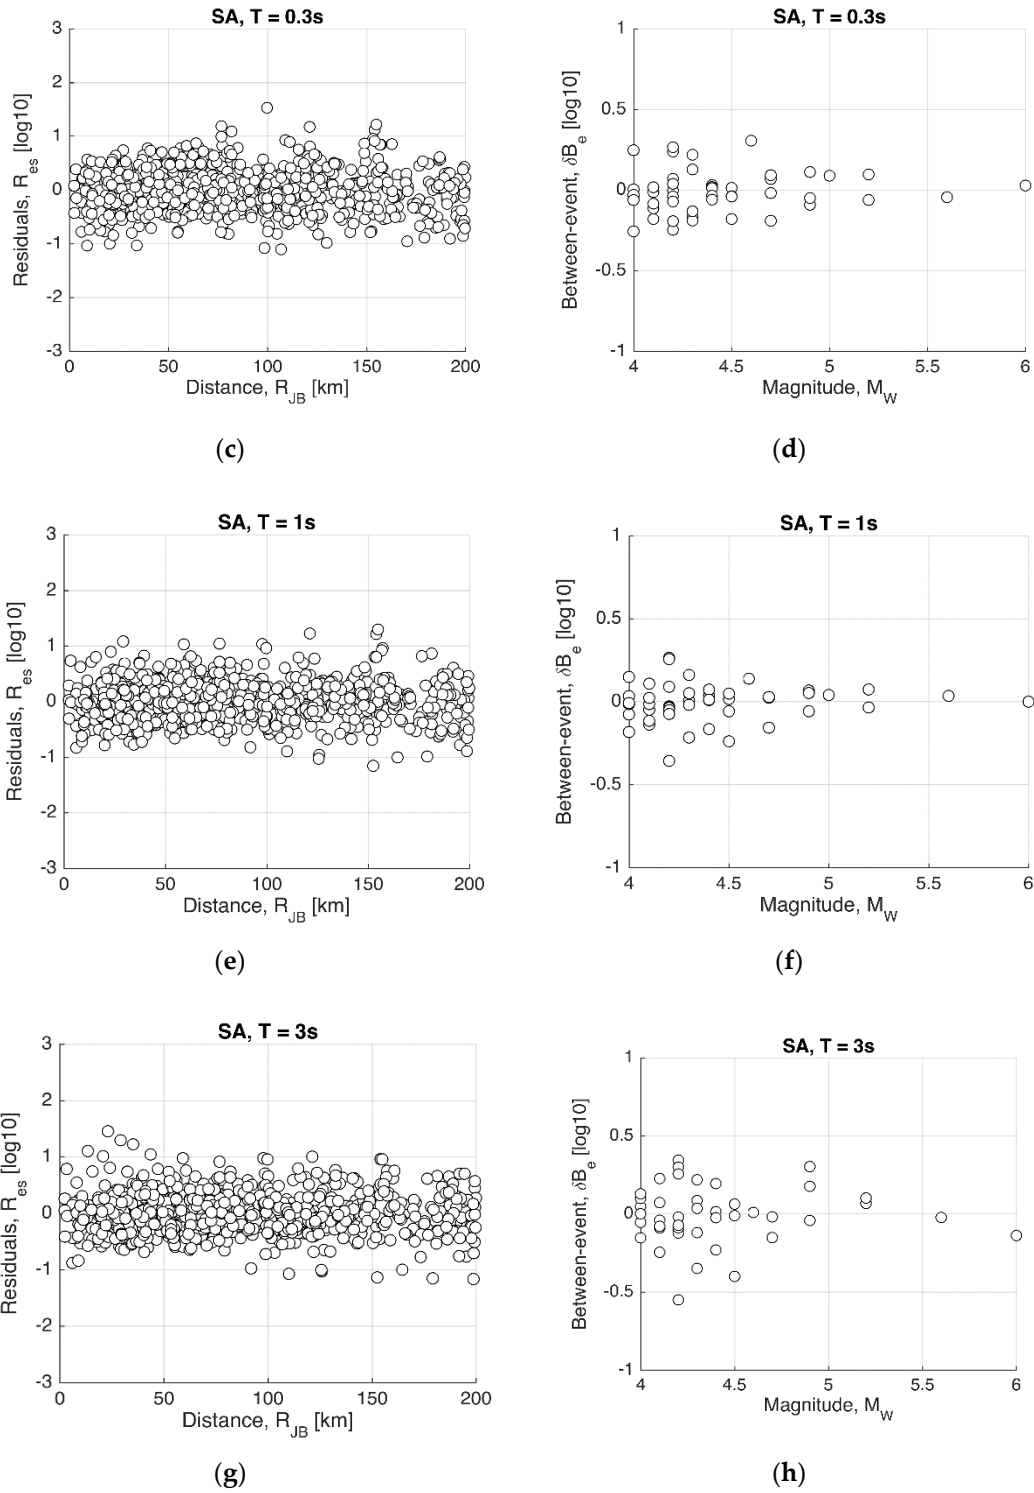

**Figure A2.** Residuals of SI17ref of PGA, SA-0.3s, 1s and 3s: (a,c,e,g) total residuals as a function of distance; (b,d,f,h) between-event residuals as a function of magnitude.

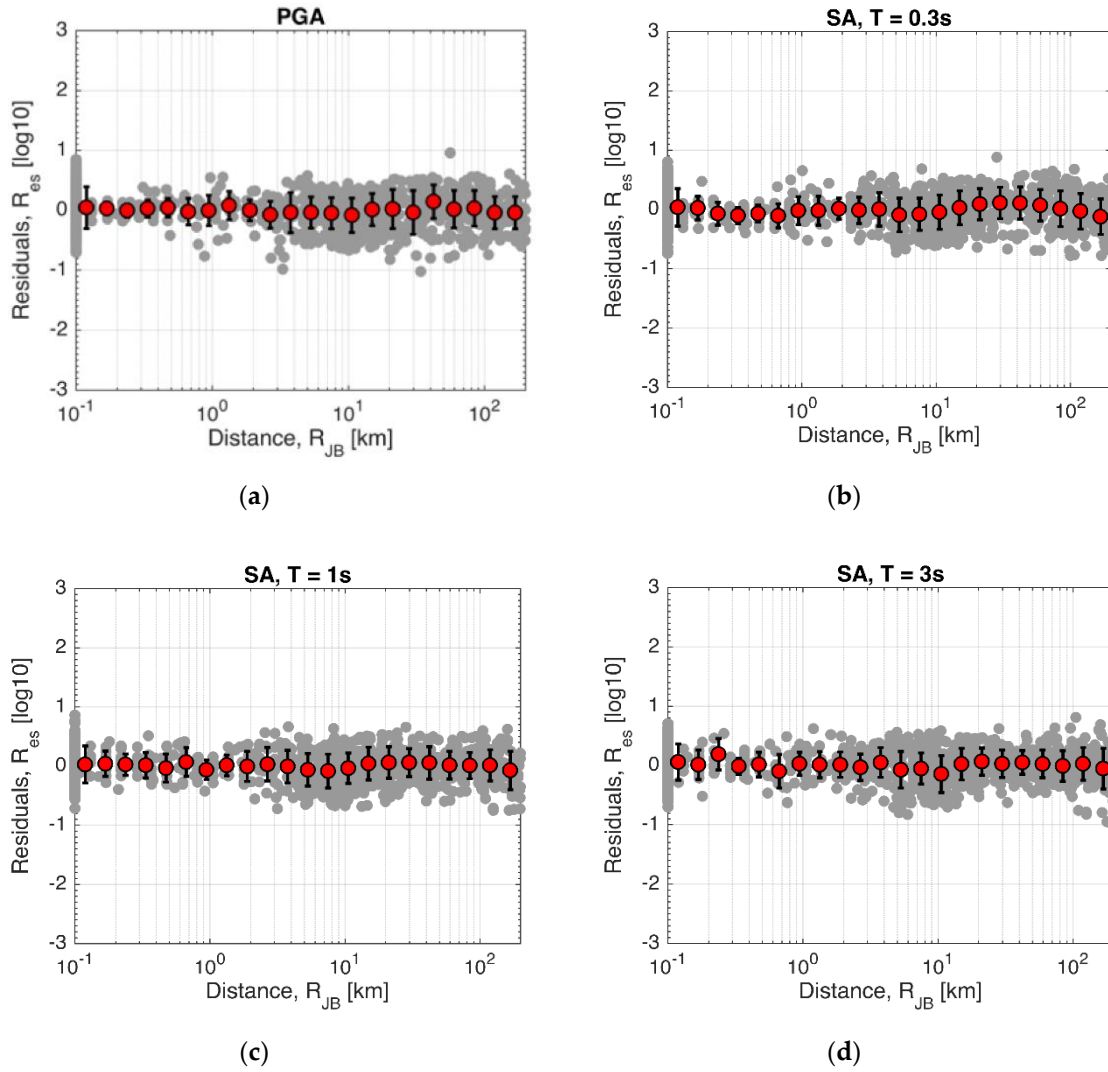

**Figure A3.** Total residuals of SET1 for SII7hyb calibration as a function of distance: (a) PGA; (b) SA-T=0.3s; (c) SA-T=1s; (d) SA-T=3s.
